# Supplementary material for: Insertion sequence polymorphism and genomic rearrangements uncover hidden Wolbachia diversity in Drosophila suzukii and D. subpulchrella
Source: PubMed Central journal article supplement (PMC5665950; doi:10.1038/s41598-017-13808-z), 2017-11-01

**Insertion sequence polymorphism and genomic rearrangements uncover hidden *Wolbachia* diversity in *Drosophila suzukii* and *D. subpulchrella***

Rupinder Kaur<sup>1,2\*</sup>, Stefanos Siozios<sup>3\*</sup>, Wolfgang J. Miller<sup>2</sup>, Omar Rota-Stabelli<sup>1@</sup>

**Table S1. Primers sequences of Insertion sequence (IS) site polymorphism and Genomic rearrangement (GR) based markers**

| <b>IS family</b> | <b>Annotation</b> | <b>Locus ID</b>         | <b>Primer name</b>   | <b>Primer sequences (5' =&gt; 3')</b>             | <b>Coordinates in wRi genome</b>   | <b>Estimated size in wRi (bps)</b> | <b>Estimated size in wSuz (bps)</b> |
|------------------|-------------------|-------------------------|----------------------|---------------------------------------------------|------------------------------------|------------------------------------|-------------------------------------|
| IS5 family       | ISWpi1            | IS1                     | ISpol1F<br>ISpol1R   | TTCGCTACCCTGTTGTTCCC<br>GGTTCAAGCTAAACACCGCG      | 385903-388478                      | 2576                               | 1600                                |
|                  | ISWpi1            | IS2                     | ISpol2F<br>ISpol2R   | ACTGCGTAGACGTTCCCTGTG<br>GTAGGGGCTGCAAGGCTTAA     | 765749-767702                      | 1954                               | 1035                                |
|                  | ISWpi1            | IS3                     | ISpol3F<br>ISpol3R   | TCGTGCAACTCCTGGTCTTC<br>GTGGGACGAGCAACAAGAGA      | 855201-856998                      | 1798                               | 879                                 |
|                  | ISWpi1            | IS4                     | ISpol4F<br>ISpol4R   | TTGAATGTGTGCCAAACCGC<br>CGTTGCTCTTGGTTGGTGTG      | 929665-931529                      | 1865                               | 946                                 |
|                  | ISWpi1            | IS5                     | ISpol5F<br>ISpol5R   | ACGCCTTAAATGGGGCTTCA<br>TTTAGTCGAAGCACGCCTGT      | 1041226-1043005                    | 1780                               | 861                                 |
|                  | ISWpi1            | IS6                     | ISpol6F<br>ISpol6R   | TGAACTGCCGCGTTCTAACT<br>GTGGGTAAACTGGGTTTCGA      | 1166783-1168253                    | 1471                               | 552                                 |
|                  | ISWpi1            | IS7                     | ISpol7F<br>ISpol7R   | ACCGCATGCGTCTCTTCCCC<br>TGCACACCGCTGCACCTTGC      | 582773-584203 /<br>1089232-1090662 | 1431                               | 512                                 |
|                  | ISWpi1            | IS31<br>(wSuz-specific) | ISpol31F<br>ISpol31R | GGGCTTTTTGCGAGTGTAGCTGT<br>CATCTTGCAGCAGGAGTGTCGT | 823636-824033                      | 398                                | 1292                                |
| IS66 family      | ISWpi5            | IS8                     | ISpol8F<br>ISpol8R   | ACCAGTATTGATGCTGCGCT<br>TGCAAAGCACAGAAACCTTCG     | 679259-681204                      | 1946                               | 456                                 |

|        |      |                      |                                                      |                 |      |     |
|--------|------|----------------------|------------------------------------------------------|-----------------|------|-----|
| ISWpi5 | IS9  | ISpol9F<br>ISpol9R   | GCAGTTTCTGGTTCTGGTGC<br>TAGTGCAGCATCTTGTGGCA         | 837678-839632   | 1955 | 330 |
| ISWpi5 | IS10 | ISpol10F<br>ISpol10R | CCGCTAGCCCCCTTATCATG<br>CACACGCCCGCTATTCCTAT         | 936354-938508   | 2155 | 665 |
| ISWpi5 | IS11 | ISpol11F<br>ISpol11R | GATACTGCGGCGGTATGACA<br>TAATCGCTATGCTCCTGCCG         | 1192806-1194739 | 1934 | 444 |
| ISWpi5 | IS12 | ISpol12F<br>ISpol12R | GGGCAGATTACCGATCAGGG<br>TTAAGCAAGAGGTTCGCAGCA        | 1253149-1255132 | 1984 | 494 |
| ISWpi5 | IS13 | ISpol13F<br>ISpol13R | ACACTGGGATGACAAACGGT<br>GGTGCTGCAATGCGTAAGTT         | 1258576-1260575 | 2000 | 510 |
| ISWpi5 | IS14 | ISpol14F<br>ISpol14R | AGCCAAGTTGTCACCTTCTGT<br>GGTCACCAGCCAGGAAAAAG        | 317383-319382   | 2000 | 512 |
| ISWpi5 | IS15 | ISpol15F<br>ISpol15R | CTGACCCTGAAAGCACTGGT<br>GAGGGCAATAGCAGAACCGA         | 866390-868283   | 1894 | 264 |
| ISWpi5 | IS16 | ISpol16F<br>ISpol16R | TGAGCACGATCCTGAAAAGGT<br>AACGCACCTACGGTATAGCG        | 877110-879053   | 1944 | 317 |
| ISWpi5 | IS17 | ISpol17F<br>ISpol17R | CGCTCTGGTTGGCAAGAAAA<br>CCCTCATCAATATCCACAGGAGT      | 1038164-1040941 | 2778 | 234 |
| ISWpi5 | IS18 | ISpol18F<br>ISpol18R | TGCTGCTCGCATAAATTCTGCCTGT<br>GTGGCAACCGATGCGCACTT    | 980518-982570   | 2028 | 357 |
| ISWpi5 | IS19 | ISpol19F<br>ISpol19R | TCGCATCAGCTTCACCCTCCCT<br>TCCTGTGTTTTTACGCGTGTTTCCA  | 198153-200132   | 1980 | 490 |
| ISWpi5 | IS20 | ISpol20F<br>ISpol20R | ACGTATTCGTGATGAACGGGCTGT<br>ACAGCAAGATGCGAAGGAGAGACT | 638019-639891   | 1873 | 383 |

|                 |                         |                      |                                                        |                                    |      |      |
|-----------------|-------------------------|----------------------|--------------------------------------------------------|------------------------------------|------|------|
| ISWpi5          | IS21                    | ISpol21F<br>ISpol21R | CCCTTCTTGCTGCTCTTCCTTTGGC<br>TTTGCTTGATACTGGAGCAACCGAT | 231991-233923                      | 1933 | 443  |
| ISWpi5          | IS22                    | ISpol22F<br>ISpol22R | AGCCAGCAAGCACAAGGTGTCA<br>GCATGGATGTTGCGATTCTCAAGGC    | 237160-238979                      | 1820 | 330  |
| ISWpi5          | IS23                    | ISpol23F<br>ISpol23R | TGCTTGGTAGGTAGATGTGTGCAAG<br>AAGTGCAATAACGGTCATAACCGCA | 256923-258881                      | 1959 | 469  |
| ISWpi5          | IS24                    | ISpol24F<br>ISpol24R | CAGCGGCAGCACTCCCAACA<br>AGCCAACCACGGGGCTTCTT           | 308087-310060                      | 1974 | 484  |
| ISWpi5          | IS25                    | ISpol25F<br>ISpol25R | CCAGCGTCACGCGCTGGAAT<br>GCTACCACGAGCGGCACTGA           | 560111-562072                      | 1962 | 472  |
| ISWpi5          | IS26                    | ISpol26F<br>ISpol26R | TGCCATGGTGC GGTTACTGTGG<br>ACAGCAGGAGTTGCTGTGGGT       | 391590-393346                      | 1757 | 270  |
| ISWpi5          | IS27                    | ISpol27F<br>ISpol27R | TTAGCCAACCACGAGGCTTC<br>GGATGTCATTCCAGTGCCCA           | 110357-112124                      | 1768 | 278  |
| ISWpi5          | IS28                    | ISpol28F<br>ISpol28R | CCTATAGCTATAACCGCCGCG<br>GTTGCTGCTCTTTTTTCGGCA         | 1430759-1435759                    | 4892 | 720  |
| ISWpi5          | IS29                    | ISpol29F<br>ISpol29R | ACGGTGGGGGTTCTCTTGGCA<br>ACCCTTTAGCACCTGTAATGCCCT      | 607466-609421 /<br>1113925-1115880 | 1959 | 466  |
| ISWpi5          | IS32<br>(wSuz-specific) | ISpol32F<br>ISpol32R | TGGGTCTTGCTGCTGGACTGA<br>ACATATCGCGCAGTCGGCAC          | 296839-297132                      | 304  | 1794 |
| IS110<br>family | ISWpi7                  | ISpol30F<br>ISpol30R | TGATGGAGTGGAGCATGCAG<br>TCGATGAAGCGGTCCAAACA           | 1404496-1406245                    | 1750 | 260  |

### Genomic Rearrangements\*

|                 |     |                  |                                                  |                                    |                            |
|-----------------|-----|------------------|--------------------------------------------------|------------------------------------|----------------------------|
| Rearrangement 1 | GR1 | c65_F<br>c65_R   | GGGAGAGTAGGTCGCCGCCA<br>AGCCAAGCGACGCAACAAACA    | 191445 – 191464<br>556008 – 556028 | no amplification<br>in wRi |
| Rearrangement 2 | GR2 | c151_F<br>c151_R | CTGCATTGCGCTATAGAGTTTGA<br>TGGCATAGATCGGAGGCTTAC | 828612 – 828634<br>779789 – 779809 | no amplification<br>in wRi |

\* since wSuz genome is not closed, we could only validate with PCR one of the breakpoints for each rearrangement.

**Table S2. 34 character-state matrix designed on IS- and GR-based *Wolbachia* strain-typing pattern**

|           |                                     |
|-----------|-------------------------------------|
| wRi       | 11111110111111111111111110111011100 |
| wSpc      | 10000000000001000000010000000001    |
| wSuz_CHN1 | 00000001000000000000000000000011    |
| wSuz_CHN2 | 00000001000000000000000000000011    |
| wSuz_JPN1 | 00000001000000000000000000000011    |
| wSuz_JPN2 | 00000001000000000000000000000011    |
| wSuz_AUT  | 000000010000000000000000200000011   |
| wSuz_ITA1 | 000000010000000000000000200000011   |
| wSuz_ITA2 | 000000010000000000000000200000011   |
| wSuz_FRA  | 000000010000000000000000200000011   |
| wSuz_GBR  | 000000010000000000000000200000011   |
| wSuz_ESP  | 000000010000000000000000200000011   |
| wSuz_SVN  | 000000010000000000000000200000011   |
| wSuz_USA  | 00000001000000000000000000000013    |
| wSuz_CAN  | 00000001000000000000000000000013    |

**Figure S1. Transposable element insertion at IS32 locus in *wSuzEU* compared to homologous gene *wRi\_002820* in *wRi* genome.  
L-TIR: Left Terminal inverted repeat**

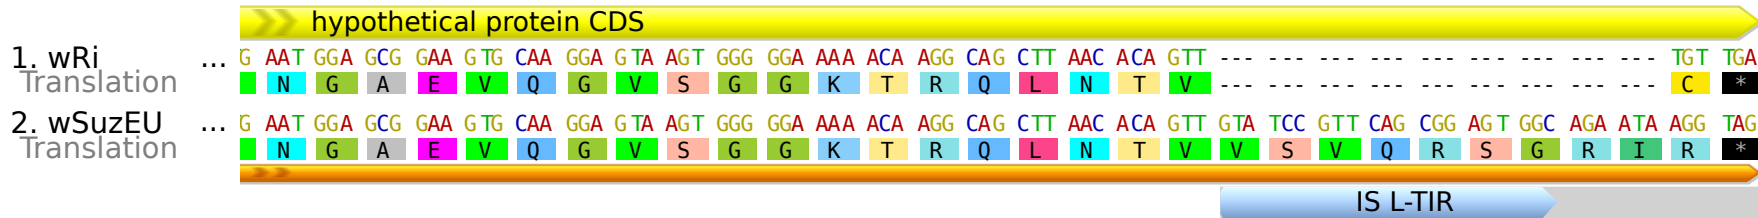

**Figure S2. Full-length gel pictures.**

Following gels correspond to IS and GR polymorphism from Figures 2A-2E and 3A, 3B in the main text. Lanes 1–10: Marker (bp) GeneRuler DNA Ladder Mix (Fermentas Life Sciences), *wRi*, *wSpc*, *wSuz\_ITA*, *wSuz\_FRA*, *wSuz\_JPN*, *wSuz\_CHN*, *wSuz\_USA*, *wSuz\_CAN* and STC-*Wolbachia* negative control.

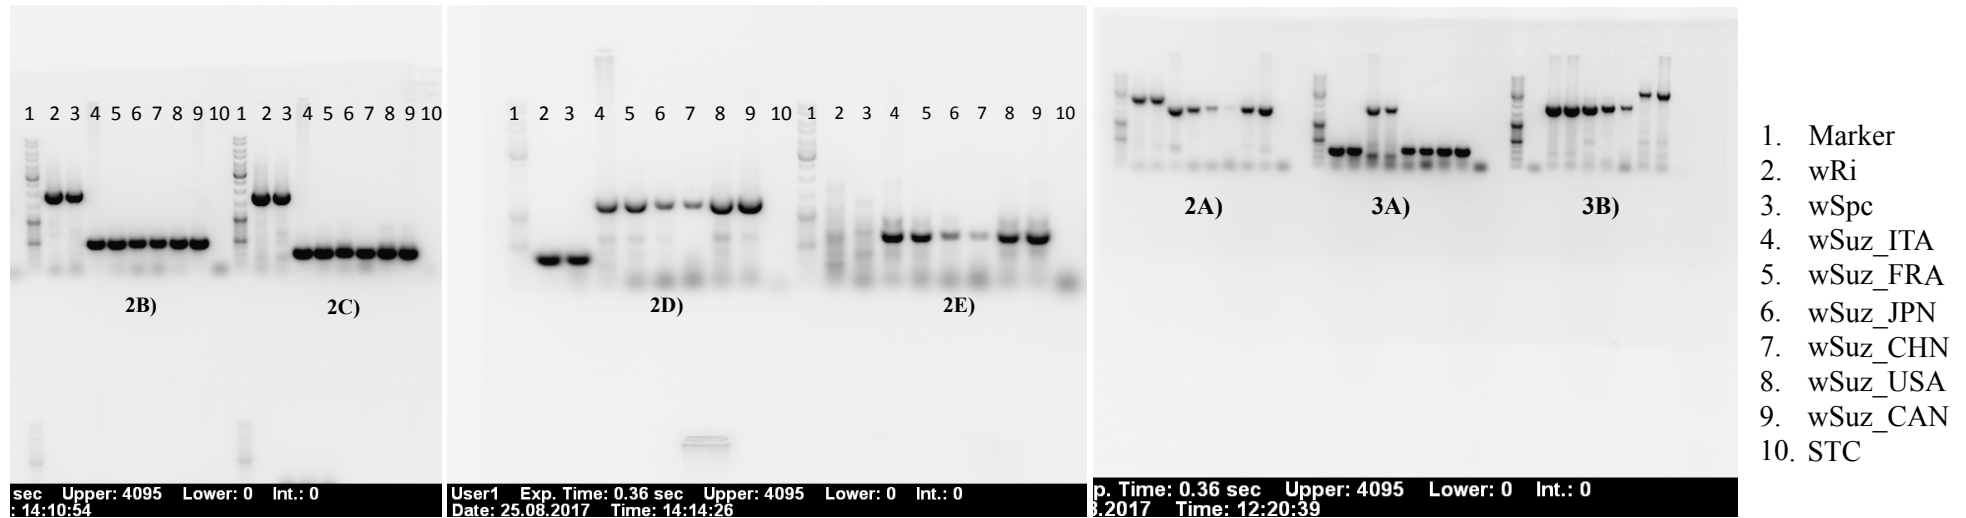

Supplement: 41598_2017_13808_MOESM1_ESM.pdf [file 41598_2017_13808_MOESM1_ESM.pdf]
